# Supplementary material
Source: PubMed Central journal article supplement (PMC5700296)
Supplement: AAC.01217-17_zac012176732s1.pdf [file AAC.01217-17_zac012176732s1.pdf]

1 **SUPPLEMENTARY TABLES AND FIGURES**

2

3 **TABLE S1** Sample size determination based on expected SVR rates

| <b>95%, 2-sided CI</b> | <b>Expected SVR rate (%)</b> |             |
|------------------------|------------------------------|-------------|
|                        | <b>90%</b>                   | <b>95%</b>  |
| <b>Sample size</b>     |                              |             |
| N=20                   | (68.3–98.8)                  | (75.1–99.9) |
| N=40                   | (76.3–97.2)                  | (83.1–99.4) |

4 CI, confidence interval; SVR, sustained virologic response.

5

6 **TABLE S2** PK parameters for ledipasvir in Panel 1

| <b>Parameter</b>            | <b>Panel 1<br/>LDV/SOF 90/400 mg QD + SMV 150 mg QD<br/>(Day 28)</b> |
|-----------------------------|----------------------------------------------------------------------|
| n                           | 20                                                                   |
| $C_{\text{trough}}$ , ng/ml | 505 (50.7)                                                           |
| $C_{\text{min}}$ , ng/ml    | 436 (47.7)                                                           |
| $C_{\text{max}}$ , ng/ml    | 731 (43.4)                                                           |
| $t_{\text{max}}$ , h        | 4.02 (2.00–24.00)                                                    |
| $AUC_{\tau}$ , ng.h/ml      | 13468 (44.1)                                                         |
| $C_{\text{ss,avg}}$ , ng/ml | 560 (44.1)                                                           |

7 All values are geometric mean (% CV) except median (range) for  $t_{\text{max}}$ .

8  $AUC_{\tau}$ , area under the curve at steady state;  $C_{\text{max}}$ , maximum plasma concentration;  $C_{\text{min}}$ ,  
 9 minimum plasma concentration;  $C_{\text{ss,avg}}$ , the average steady-state plasma concentration;  $C_{\text{trough}}$ ,  
 10 trough plasma concentration; CV, coefficient of variation; LDV, ledipasvir; PK,  
 11 pharmacokinetic; QD, once daily; SMV, simeprevir; SOF, sofosbuvir;  $t_{\text{max}}$ , time to  $C_{\text{max}}$ .

12

13 **TABLE S3** PK parameters for simeprevir in Panel 2

| Parameter                   | Panel 2<br>SMV 150 mg QD + LDV/SOF 90/400 mg QD<br>(Day 28) |
|-----------------------------|-------------------------------------------------------------|
| n                           | 18 <sup>a</sup>                                             |
| $C_{\text{trough}}$ , ng/ml | 5266 (72.2)                                                 |
| $C_{\text{min}}$ , ng/ml    | 4889 (68.6)                                                 |
| $C_{\text{max}}$ , ng/ml    | 11267 (45.0)                                                |
| $t_{\text{max}}$ , h        | 6.00 (4.00–11.98)                                           |
| $AUC_{\tau}$ , ng.h/ml      | 186822 (55.2)                                               |
| $C_{\text{ss,avg}}$ , ng/ml | 7774 (55.1)                                                 |

14 All values are geometric mean (% CV) except median (range) for  $t_{\text{max}}$ .<sup>a</sup>Due to PK profile not  
 15 taken for 2 patients.

16  $AUC_{\tau}$ , area under the curve at steady state;  $C_{\text{max}}$ , maximum plasma concentration;  $C_{\text{min}}$ ,  
 17 minimum plasma concentration;  $C_{\text{ss,avg}}$ , the average steady-state plasma concentration;  $C_{\text{trough}}$ ,  
 18 trough plasma concentration; CV, coefficient of variation; LDV, ledipasvir; PK,  
 19 pharmacokinetic; QD, once daily; SMV, simeprevir; SOF, sofosbuvir;  $t_{\text{max}}$ , time to  $C_{\text{max}}$ .

20

21

22 **TABLE S4** PK parameter ratios for simeprevir and ledipasvir at Day 28 versus Day 14

|        | PK parameter ratios of SMV,<br>Day 28/14 |                               |                               | PK parameter ratios of LDV,<br>Day 28/14 |                               |                               |
|--------|------------------------------------------|-------------------------------|-------------------------------|------------------------------------------|-------------------------------|-------------------------------|
|        | <b>C<sub>min</sub></b><br>(%)            | <b>C<sub>max</sub></b><br>(%) | <b>AUC<sub>τ</sub></b><br>(%) | <b>C<sub>min</sub></b><br>(%)            | <b>C<sub>max</sub></b><br>(%) | <b>AUC<sub>τ</sub></b><br>(%) |
| N      | 20                                       | 19                            | 19                            | 18                                       | 17                            | 17                            |
| Mean   | 619.67                                   | 258.48                        | 356.34                        | 182.35                                   | 171.17                        | 180.98                        |
| SD     | 422.82                                   | 118.46                        | 207.21                        | 55.19                                    | 50.24                         | 48.01                         |
| Min    | 108.39                                   | 118.13                        | 112.03                        | 97.47                                    | 87.78                         | 104.30                        |
| Median | 584.33                                   | 248.94                        | 350.57                        | 179.34                                   | 155.93                        | 174.88                        |
| Max    | 1632.39                                  | 533.65                        | 903.58                        | 335.29                                   | 275.70                        | 284.18                        |
| % CV   | 68.2                                     | 45.8                          | 58.2                          | 30.3                                     | 29.4                          | 26.5                          |

23 AUC<sub>τ</sub>, area under the curve at steady state; C<sub>max</sub>, maximum plasma concentration; C<sub>min</sub>,  
 24 minimum plasma concentration; CV, coefficient of variation; LDV, ledipasvir; PK,  
 25 pharmacokinetic; SMV, simeprevir.

26

27 **Fig. S1.** Patient disposition (ITT population).

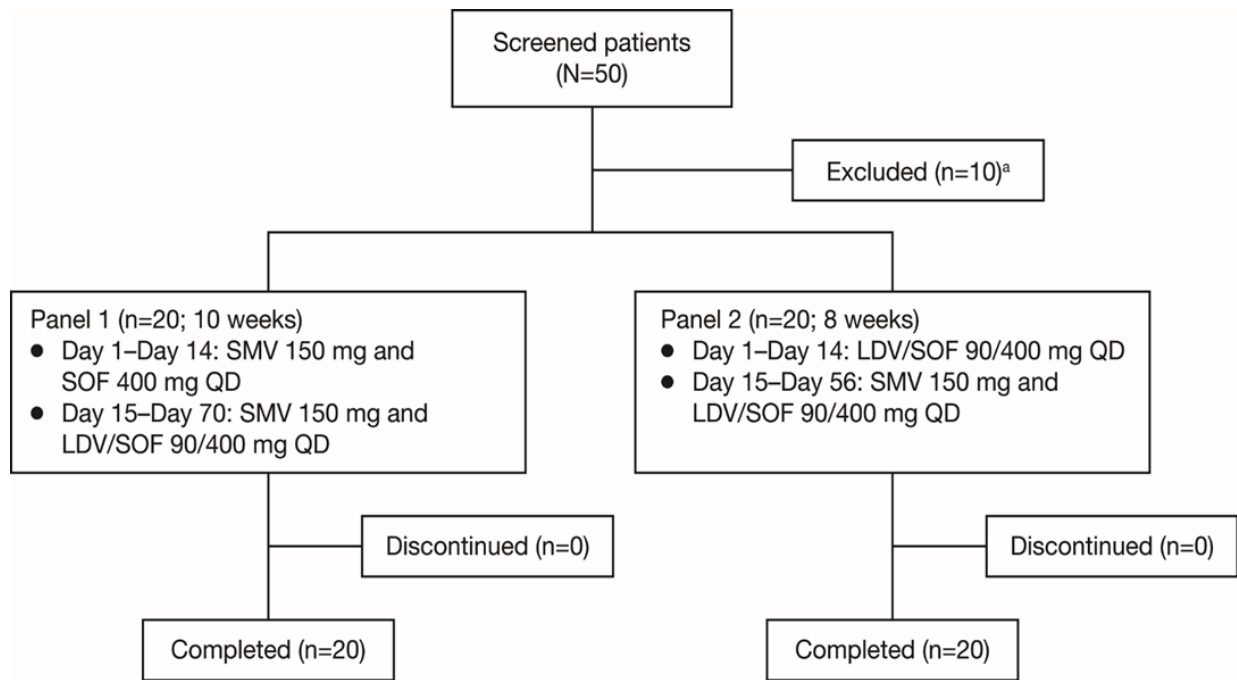

28

29 <sup>a</sup>Due to the following reasons: HCV RNA >6,000,000 IU/ml (5/10), HCV RNA >6,000,000  
30 IU/ml and BMI out of range (1/10), BMI was too high (1/10), no suitable veins (1/10), no  
31 suitable veins/drug abuse/no stable medication intake (1/10), withdrawal of consent (1/10).

32 BMI, body mass index; HCV, hepatitis C virus; ITT, intent-to-treat; LDV, ledipasvir; QD,  
33 once daily; SMV, simeprevir; SOF, sofosbuvir.

34
